# Supplementary material
Source: PubMed Central journal article supplement (PMC7965497)
Supplement: 3191_tables.pdf [file 3191_tables.pdf]

**On-line Table 1: Treatment modalities and complications**

| No. | Antiplatelet | WEB Size<br>(Width ×<br>Height, mm) | Add. Trt      | TE  | IOR | Compl.<br>Outcome |
|-----|--------------|-------------------------------------|---------------|-----|-----|-------------------|
| 1   | Asp          | 8 × 6                               | No            | No  | No  | NC                |
| 2   | Asp          | 7 × 4                               | No            | No  | No  | NC                |
| 3   | Asp          | 5 × 5                               | Coils         | No  | No  | NC                |
| 4   | Asp          | 5 × 3                               | No            | No  | No  | NC                |
| 5   | Asp + Clop   | 5 × 3                               | No            | No  | No  | NC                |
| 6   | Asp          | 6 × 3                               | Coils         | Yes | No  | TD                |
| 7   | Asp          | 6 × 4                               | No            | No  | No  | NC                |
| 8   | Asp          | 6 × 4                               | No            | No  | No  | NC                |
| 9   | Asp          | 6 × 3                               | No            | No  | No  | NC                |
| 10  | Asp          | 6 × 4                               | No            | No  | No  | NC                |
| 11  | Asp          | 5 × 4                               | No            | No  | No  | NC                |
| 12  | No           | 7 × 6                               | No            | No  | No  | NC                |
|     | No           | 6 × 3                               | No            | Yes | No  | NC                |
| 13  | Asp          | 6 × 5                               | No            | No  | No  | NC                |
| 14  | Asp          | 9 × 7                               | No            | No  | No  | NC                |
| 15  | Asp          | 6 × 4                               | No            | No  | No  | NC                |
| 16  | Asp          | 8 × 6                               | No            | No  | No  | NC                |
| 17  | No           | 7 × 6                               | No            | No  | No  | NC                |
| 18  | No           | 5 × 4                               | Stent         | Yes | No  | NC                |
| 19  | Asp + Clop   | 6 × 4                               | Coils         | No  | No  | NC                |
| 20  | Asp + Clop   | 11 × 9                              | Coils + Stent | No  | No  | NC                |

**Note:**—Asp indicates aspirin; Clop, clopidogrel; Add. Trt, additional treatment; TE, thromboembolic event; IOR, intraoperative rupture; Compl. Outcome, complication outcome; NC, no change; TD, transient deficit.

**On-line Table 2: Postoperative, 24–48 hour, and midterm anatomic results**

| No. | Postoperative Results | 24- to 48-Hour Follow-Up <sup>a</sup> | DSA Follow-Up (delay, mo) | Aneurysm Occlusion | Parent Artery Status |
|-----|-----------------------|---------------------------------------|---------------------------|--------------------|----------------------|
|     |                       |                                       |                           | at DSA Follow-Up   | at DSA Follow-Up     |
| 1   | 2                     | 0                                     | 3 mol/L                   | NR                 | P                    |
| 2   | 1                     | 0                                     | 3 mol/L                   | NR                 | P                    |
| 3   | 0                     | 1                                     | 3 mol/L                   | TO                 | P                    |
| 4   | 1                     | 0                                     | 3 mol/L                   | NR                 | P                    |
| 5   | 0                     | 0                                     | —                         | —                  | —                    |
| 6   | 1                     | 0                                     | —                         | —                  | —                    |
| 7   | 0                     | 0                                     | 12 mol/L                  | TO                 | P                    |
| 8   | 0                     | 0                                     | 8 mol/L                   | AR                 | P                    |
| 9   | 1                     | 1                                     | 6 mol/L                   | NR                 | P                    |
| 10  | 0                     | 0                                     | 6 mol/L                   | TO                 | P                    |
| 11  | 1                     | 1                                     | 6 mol/L                   | TO                 | P                    |
| 12  | 2                     | 2                                     | 5 mol/L                   | AR                 | P                    |
|     | 0                     | 0                                     | 5 mol/L                   | TO                 | P                    |
| 13  | 1                     | 1                                     | 6 mol/L                   | NR                 | P                    |
| 14  | 1                     | 1                                     | 6 mol/L                   | AR                 | P                    |
| 15  | 0                     | 0                                     | —                         | —                  | —                    |
| 16  | 0                     | 0                                     | —                         | —                  | —                    |
| 17  | 0                     | 0                                     | 3 mol/L                   | TO                 | P                    |
| 18  | 0                     | 0                                     | 7 mol/L                   | TO                 | P                    |
| 19  | 0                     | 0                                     | —                         | —                  | —                    |
| 20  | 0                     | 0                                     | —                         | —                  | —                    |

**Note:**—TO indicates total occlusion; NR, neck remnant; AR, aneurysm remnant; P, patent. <sup>a</sup>0 = no residual flow inside the aneurysm and the device; 1 = residual flow inside the proximal compartment; 2 = residual flow in the distal compartment; 3 = residual flow between the device and the aneurysm wall or at the dome.
